# Supplementary material for: Mechanism design and parameter optimization of a new asymmetric translational parallel manipulator
Source: Copernicus journal article supplement (doi:10.5194/ms-10-255-2019), 2019-06-18
Supplement: Supplementary file 1 [file ms-10-255-2019-supplement.zip]

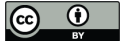

## *Supplement of*

# **Mechanism design and parameter optimization of a new asymmetric translational parallel manipulator**

**Yi Yang et al.**

*Correspondence to:* Yan Peng (pengyan@shu.edu.cn)

- ms-10-255-2019-supplement-title-page.pdf
- Motion experiments.avi
- Trajectory planning.mp4

The copyright of individual parts of the supplement might differ from the CC BY 4.0 License.
